# Supplementary material
Source: MDPI journal article supplement (https://www.mdpi.com/2571-6182/5/4/30)
Supplement: s1 [file s1]

# Supplementary files

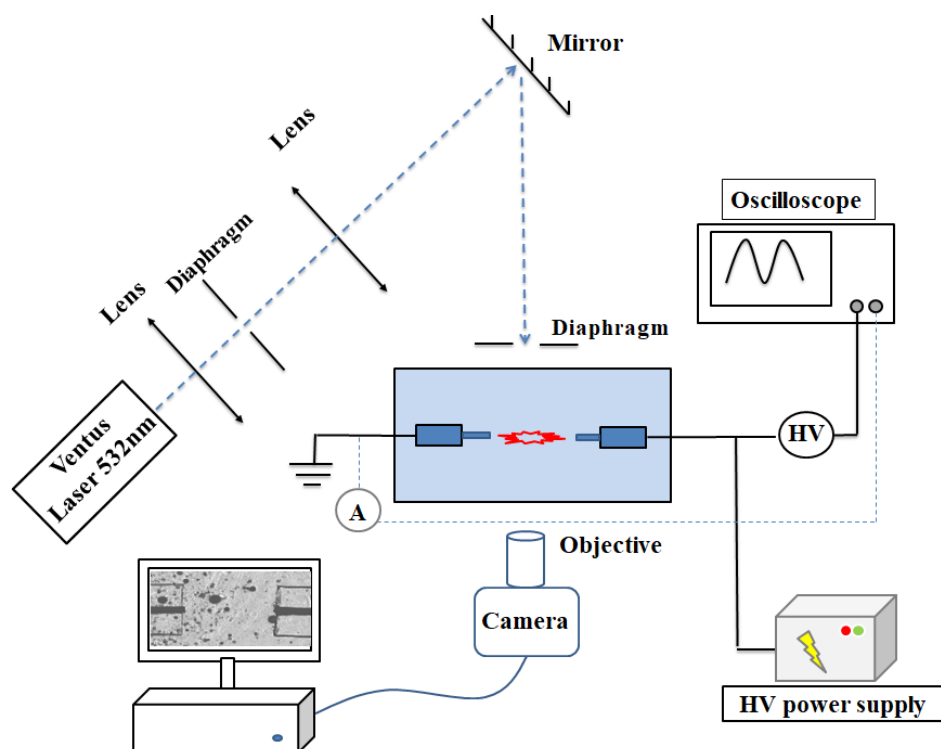

**Figure S1.** Schematic diagram of the optical diagnostics in Cr(VI) – the camera is a high-speed (Photron SAS) model for time-resolved shadowgraphy measurements (exposure time of  $0.37\ \mu\text{s}$ ; frame rate of 372 kfps) and Andor istar 734 model for fast imaging (exposure time of 100 ns). The laser is off during imaging.

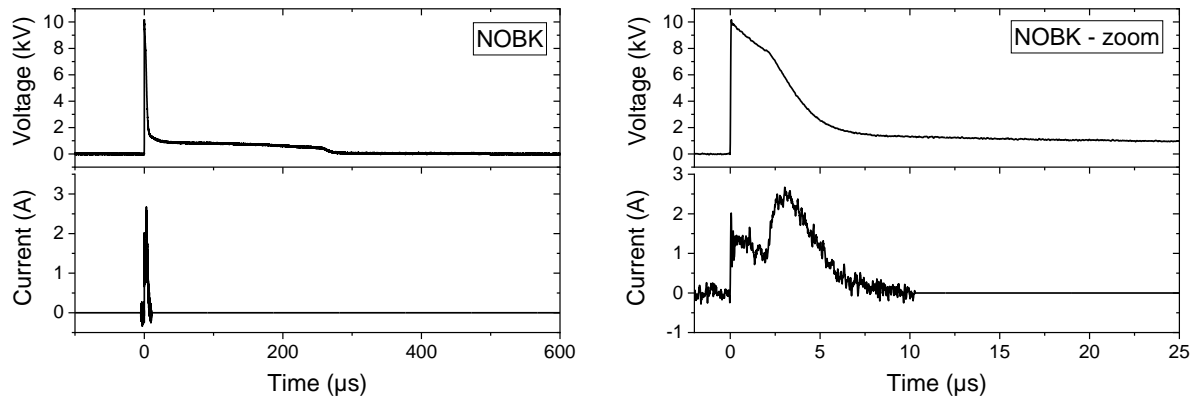

(a)

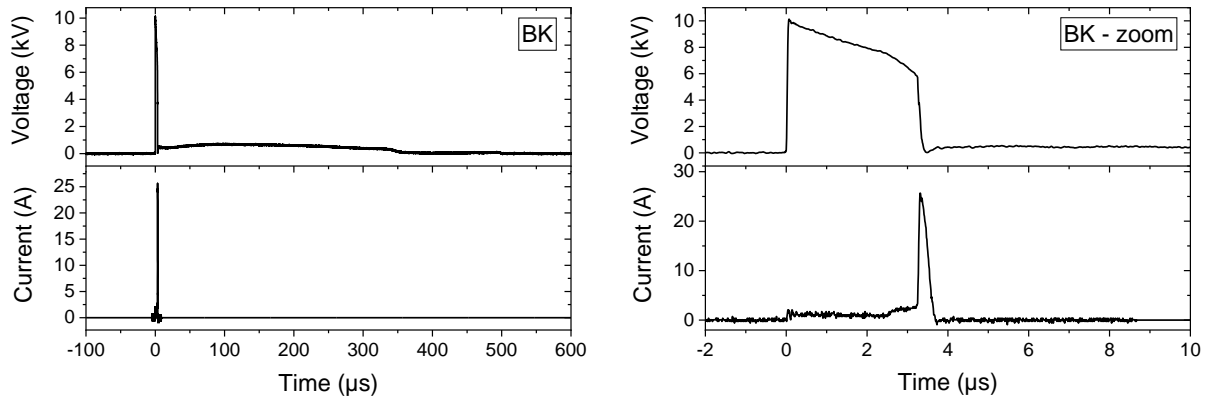

(b)

**Figure S2.** Voltage and current signals for (a) case NOBK (a zoom on the right), (b) case BK (a zoom on the right) of a pin-to-pin discharge obtained in Cr(VI) solution (47 mg/L,  $\sigma=4$  mS/cm, pH=2.4) for 11 kV,  $V = 100$  mL,  $\Delta t = 500$   $\mu\text{s}$ , gap = 2 mm, electrodes length =  $0 \pm 10$   $\mu\text{m}$ ,  $f = 50$  Hz. The signals have been processed (Savitzky-Golay filter and cut off detection) and the resulting uncertainties are considered in energy calculation.

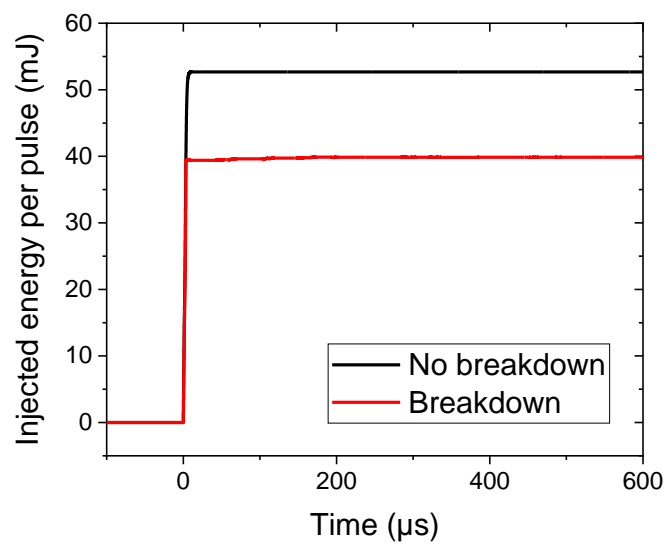

**Figure S3.** Energy per pulse for BK and NOBK discharges for pin-to-pin discharges in Cr(VI) solution (47 mg/L,  $\sigma=4$  mS/cm, pH=2.3),  $V = 100$  mL,  $U=9$  kV,  $\Delta t = 500$   $\mu\text{s}$ , gap = 2 mm, electrodes length =  $0 \pm 10$   $\mu\text{m}$ ,  $f = 50$  Hz.

| Power supply                      | Geometry                     | Inter-electrode distance | Voltage | Current   | Volume of reactor | Initial concentration    | pH of solution | Time of process | Reduction efficiency | Energy Yield $G_{Cr(VI)}/g/kJ$ | References            |
|-----------------------------------|------------------------------|--------------------------|---------|-----------|-------------------|--------------------------|----------------|-----------------|----------------------|--------------------------------|-----------------------|
| Plasma discharge above the liquid |                              |                          |         |           |                   |                          |                |                 |                      |                                |                       |
| DC                                | Pin-to-plate with gas supply | ~3-5 mm                  | 1.3 kV  | 40 mA     | 20 mL             | 40 mg/L                  | 2              | 4 min           | 100%                 | $0.64 \times 10^{-4} *$        | {Ke, 2011 #411}       |
| DC                                | Pin-to-plate with gas supply | 2 mm                     | 1 kV    | 40 mA     | 25 mL             | 40 mg/L                  | 2              | 3 min           | 100%                 | $1.4 \times 10^{-4} *$         | {DU, 2017 #624}       |
| Plasma discharge in liquid        |                              |                          |         |           |                   |                          |                |                 |                      |                                |                       |
| DC                                | Pin-to-plate                 | -                        | 0.6 kV  | 120 mA    | 150 mL            | 31.2 mg/L                | 2              | 18 min          | 96%                  | $6 \times 10^{-5} *$           | {Jiang, 2015 #559}    |
| DC                                | Pin-to-plate                 | -                        | 0.6 kV  | 936 mA    | -                 | 100 mg/L mix with phenol | -              | 30 min          | 93.35%               | $3.4 \times 10^{-4}$           | {Harianti, 2017 #615} |
| DC                                | Pin-to-plate                 | -                        | 0.5 kV  | 100 mA    | 150 mL            | 50 mg/L                  | 2              | 5 min           | 97%                  | $4.9 \times 10^{-4} *$         | {Wang, 2008 #427}     |
| Pulse DC                          | Pin-to-pin                   | 0.5 mm                   | 9 kV    | Peak 40 A | 100 mL            | 47 mg/L                  | 2.4            | 90 min          | 100 %                | $4.7 \times 10^{-4}$           | This work             |

**Table S1** - Comparison of reduction efficiency and energy yield for Cr(VI) reduction by plasma liquid interaction processes. \* these values have been calculating using Equation 2 and data of the references
